# Supplementary material for: Administrative Groupings and Equality in Public Service Provision
Source: Oxford University Press journal article supplement (doi:10.1093/jopart/muab031), 2021-08-02
Supplement: muab031_suppl_supplementary_materials_s1.docx [file muab031_suppl_supplementary_materials_s1.docx]

/*

Stata code to reproduce analyses presented in "Adminsitrative Grouping and Eqaulity

Public Service provision". Journal of Public Administration Research and Theory

Stata version 15

*/

******************

*MEASURES

******************

/*

instnr: school identifier

cohort: school grade level identifier

class: class identifier

spc_pupil: dummy variable, takes the value 1 if student recieves special education

spc_magnitude: amount of speciel education received in hours

test: standardized testscore

test_class_std: standardized class room average

immigrant: dummy variable, takes the value 1 if student is an immigrant or decendant of immigrants

psych_diag: dummy variable, takes the value 1 if student has a psychiatric diagnosis

edu_parents: parental education in years

birth order: birth order indicator, takes the value 1 if the child is the oldest

x_lmo: class room leave me out mean

grade: grade level indicator

class_number: number of classes at school grade level

class_size: number of students in class

class_test_size: number of students in class who have taken the test

*/

******************

*SAMPLE

******************

/*Exclude special education class rooms, exclude implausible class sizes, exclude

classes where more than 3 students have not taken the national test, include

only grade levels that take the national test */

keep if class_spc_all_share <0.8 & class_size > 4 & class_size < 31 ///

& class_size-class_test_size <=3 & inlist(grade_,3,4,5,6,7,8,9)

******************

*RANDOMIZATION CHECKS

******************

preserve

bys class: gen x =_n

keep if x ==1 & class_number >1

*Classroom deviation from cohort

foreach var in boy immigrant psych_diag edu_parents {

gen `var'_cohort_lmo =.

levelsof cohort if class_number >1, local(levels)

foreach c of local levels {

levelsof class if cohort ==`c', local(class)

foreach 1 of local class {

qui sum `var' if cohort ==`c' & class !=`1'

replace `v'_cohort_lmo = r(mean) if cohort ==`c' & class ==`1'

}

}

bys class: gen class_cohort_diff_`var' = `var'_class_avg - `var'_cohort_lmo

hist class_cohort_diff_`var'

}

*Chi2 and Kruskow Wallis

foreach var in immigrant boy psych_diag {

gen `var'_chi_p =.

levelsof cohort, local(levels)

foreach 1 of local levels {

qui tab `var' class if cohort ==`1', chi

replace `var'_chi_p = r(p) if cohort ==`1'

}

}

gen edu_parents_kwallis =.

levelsof cohort, local(levels)

foreach 1 of local levels {

qui kwallis edu_parents if cohort ==`1', by(class)

replace `var'_kwallis = (1-chi2(r(df),r(chi2_adj))) if cohort ==`1'

}

bys cohort: gen y = _n

foreach var in immigrant boy psych_diag {

hist `var'_chi_p if y ==1

}

hist edu_parents_kwallis if y ==1

*Analysis of variance

egen test_total = mean(test_class_std)

bys cohort: egen test_cohort =mean(test_class_std)

sst:(test_class_std -test_total)^2

gen test_ssw = (test_class_std - test_cohort)^2

gen test_ssb = (test_cohort-test_total)^2

sum test_avg_total test_sst test_ssw test_ssb

restore

******************

*ANALYSES

******************

global control "edu_parents_std boy immigrant psych_diag i.grade immigrant_lmo_std boy_lmo_std psych_diag_lmo_std edu_parents_lmo_std"

xtset instnr

*Table 3

eststo model_1: xtreg spc_pupil test_class_std test i.grade , fe robust

eststo model_2: xtreg spc_pupil test_class_std test $control , fe robust

eststo model_3: xtreg spc_pupil c.test_class_std##c.test $control, fe robust

*Table 4

eststo model_1: xtreg spc_magnitude test_class_std test $control, fe robust

eststo model_2: xtreg spc_magnitude test_class_std test $control if spc_pupil ==1, fe robust

*Table 5

eststo model_1: xtreg spc_pupil test_class_std test class_size_std $control, fe robust

eststo model_2: xtreg spc_pupil test_class_std test $control if grade ==3, fe robust

eststo model_3: xtreg spc_pupil test_class_std test $control if grade ==3 & birth_order==1 , fe robust

*Table A1

xtreg spc_pupil test_class_std test $control if cohort_size == cohort_test_size, fe robust

*Table A2

xtlogit spc_pupil test_class_std test $control, fe

*Table A3

xtreg spc_pupil test_class_std test $control if e(sample), fe robust
