# Supplementary material for: Administrative Groupings and Equality in Public Service Provision
Source: Oxford University Press journal article supplement (doi:10.1093/jopart/muab031), 2021-08-02
Supplement: muab031_suppl_supplementary_materials_s2.docx [file muab031_suppl_supplementary_materials_s2.docx]

# Appendix

**[Figure A1 around here]**

**Table A1: Referrals to special education, complete cohorts only**

|  | Referral |
| --- | --- |
| Grouping effect | **0.020*****  (0.002)  [0.000] |
| Test score | **-0.081*****  (0.003)  [0.000] |
| Constant | **0.087*****  (0.003)  [0.000] |
| N | 66,589 |
| Schools | 888 |

Note: School fixed effects. Grade level indicators, individual and class level control variables included, but not shown. OLS coefficients, *p <.05; **p < .01; ***p < .001. Robust standard errors in parentheses. Exact p-values in square brackets

**Table A2: Referrals to special education, conditional logistic regression**

|  | Referral |
| --- | --- |
| Grouping effect | **0.277*****  (0.012)  [0.000] |
| Test score | **-1.251*****  (0.010)  [0.000] |
| N | 254,397 |
| Schools | 1,044 |

Note: School fixed effects. Grade level indicators, individual and class level control variables included, but not shown. Odds ratios, *p < .05; **p < .01; ***p < .001. Standard errors in parentheses. Exact p-values in square brackets.

**Table A3: Referrals to special education, Linear probability model estimated with conditional logistic regression sample**

|  | Referral |
| --- | --- |
| Grouping effect | **0.018*****  (0.001)  [0.000] |
| Test score | **-0.091*****  (0.002)  [0.000] |
| Constant | **0.102*****  (0.002)  [0.000] |
| N | 254,397 |
| Schools | 1,044 |

Note: School fixed effects. Grade level indicators, individual and class level control variables included, but not shown. OLS coefficients, *p <.05; **p < .01; ***p < .001. Robust standard errors in parentheses. Exact p-values in square brackets
